# Supplementary material for: The expression pattern of matrix-producing tumor stroma is of prognostic importance in breast cancer
Source: PubMed Central journal article supplement (PMC5095990; doi:10.1186/s12885-016-2864-2), 2016-11-04
Supplement: 12885_2016_2864_MOESM1_ESM.pdf [file 12885_2016_2864_MOESM1_ESM.pdf]

**Table S1. TCGA data sets.**

| <b>TCGA set</b>                             | <b>Abbreviation</b> | <b>mRNA data<br/>download<br/>(date YYYYMMDD)</b> | <b>Survival data<br/>download<br/>(date YYYYMMDD)</b> | <b>End<br/>point</b> |
|---------------------------------------------|---------------------|---------------------------------------------------|-------------------------------------------------------|----------------------|
| Breast<br>Carcinoma                         | BRCA                | 150130                                            | 150918                                                | NTE                  |
| Colon Adeno-<br>carcinoma                   | COAD                | 140806                                            | 150917                                                | OS                   |
| Head and Neck<br>Squamous Cell<br>Carcinoma | HNSC                | 140806                                            | 150918                                                | OS                   |
| Kidney Renal<br>Clear Cell<br>Carcinoma     | KIRC                | 140115                                            | 150918                                                | OS                   |
| Lung Adeno-<br>carcinoma                    | LUAD                | 140806                                            | 150917                                                | OS                   |
| Lung Squamous<br>Cell Carcinoma             | LUSC                | 140806                                            | 150917                                                | OS                   |

---

OS – Overall survival, NTE – New tumor event
