# Supplementary material for: The expression pattern of matrix-producing tumor stroma is of prognostic importance in breast cancer
Source: PubMed Central journal article supplement (PMC5095990; doi:10.1186/s12885-016-2864-2), 2016-11-04
Supplement: 12885_2016_2864_MOESM2_ESM.pdf [file 12885_2016_2864_MOESM2_ESM.pdf]

**Table S2. Breast cancer data sets.**

| <b>Dataset</b>           | <b>Source</b>       | <b>Download<br/>(date<br/>YYMMDD)</b> | <b>No of<br/>samples</b> | <b>ER<br/>(neg/pos)</b> | <b>Node status<br/>(neg/pos)</b> | <b>Endpoint</b> | <b>Event<br/>(no/yes)</b> | <b>Median<br/>followup<br/>time (days)</b> |
|--------------------------|---------------------|---------------------------------------|--------------------------|-------------------------|----------------------------------|-----------------|---------------------------|--------------------------------------------|
| TCGA<br>Breast<br>Cancer | TCGA<br>data portal | 150130                                | 1086                     | 226/779                 | 597/536                          | NTE             | 763/110                   | 858                                        |
| GEOD21653                | ArrayExpress        | 140811                                | 266                      | 113/150                 | 120/140                          | DFS             | 169/83                    | 1609                                       |
| EMTAB365                 | ArrayExpress        | 140805                                | 537                      | 108/407                 | 139/299                          | MFS             | 408/119                   | 1886                                       |

NTE – New tumor events, DFS – Disease-free survival, MFS –metastasis-free survival
