# Supplementary material for: The expression pattern of matrix-producing tumor stroma is of prognostic importance in breast cancer
Source: PubMed Central journal article supplement (PMC5095990; doi:10.1186/s12885-016-2864-2), 2016-11-04
Supplement: 12885_2016_2864_MOESM3_ESM.pdf [file 12885_2016_2864_MOESM3_ESM.pdf]

**Table S3. Expanded ECM gene set used for identification of compact ECM cluster**

|                 |                 |                 |
|-----------------|-----------------|-----------------|
| <i>ADAM12</i>   | <i>DACT1</i>    | <i>NOX4</i>     |
| <i>ADAMTS12</i> | <i>DCN</i>      | <i>OLFML1</i>   |
| <i>ADAMTS2</i>  | <i>ECM2</i>     | <i>OLFML2B</i>  |
| <i>AEBP1</i>    | <i>FAM26E</i>   | <i>OMD</i>      |
| <i>ANTXR1</i>   | <i>FAP</i>      | <i>P4HA3</i>    |
| <i>ASPN</i>     | <i>FBN1</i>     | <i>PCOLCE</i>   |
| <i>BNC2</i>     | <i>FIBIN</i>    | <i>PDGFRB</i>   |
| <i>C10orf72</i> | <i>FN1</i>      | <i>PODN</i>     |
| <i>C14orf37</i> | <i>FSTL1</i>    | <i>POSTN</i>    |
| <i>CCDC80</i>   | <i>GLT8D2</i>   | <i>PRRX1</i>    |
| <i>CDH11</i>    | <i>GXYLT2</i>   | <i>RASGRF2</i>  |
| <i>CHSY3</i>    | <i>HEG1</i>     | <i>RECK</i>     |
| <i>COL10A1</i>  | <i>HMCN1</i>    | <i>SERPINF1</i> |
| <i>COL12A1</i>  | <i>HTRA1</i>    | <i>SFRP2</i>    |
| <i>COL1A1</i>   | <i>ITGA11</i>   | <i>SPARC</i>    |
| <i>COL1A2</i>   | <i>KIAA1462</i> | <i>SRPX2</i>    |
| <i>COL3A1</i>   | <i>LOX</i>      | <i>TCF4</i>     |
| <i>COL5A1</i>   | <i>LRRC15</i>   | <i>THBS2</i>    |
| <i>COL5A2</i>   | <i>LUM</i>      | <i>THY1</i>     |
| <i>COL6A1</i>   | <i>MAGEL2</i>   | <i>TIMP2</i>    |
| <i>COL6A2</i>   | <i>MFAP5</i>    | <i>TSHZ3</i>    |
| <i>COL6A3</i>   | <i>MMP2</i>     | <i>VCAN</i>     |
| <i>COL8A1</i>   | <i>MSRB3</i>    | <i>WISP1</i>    |
| <i>COL8A2</i>   | <i>MXRA5</i>    | <i>ZEB1</i>     |
| <i>CTSK</i>     | <i>NID1</i>     | <i>ZFPM2</i>    |
| <i>CYS1</i>     | <i>NID2</i>     |                 |
