# Supplementary material for: The expression pattern of matrix-producing tumor stroma is of prognostic importance in breast cancer
Source: PubMed Central journal article supplement (PMC5095990; doi:10.1186/s12885-016-2864-2), 2016-11-04
Supplement: 12885_2016_2864_MOESM7_ESM.pdf [file 12885_2016_2864_MOESM7_ESM.pdf]

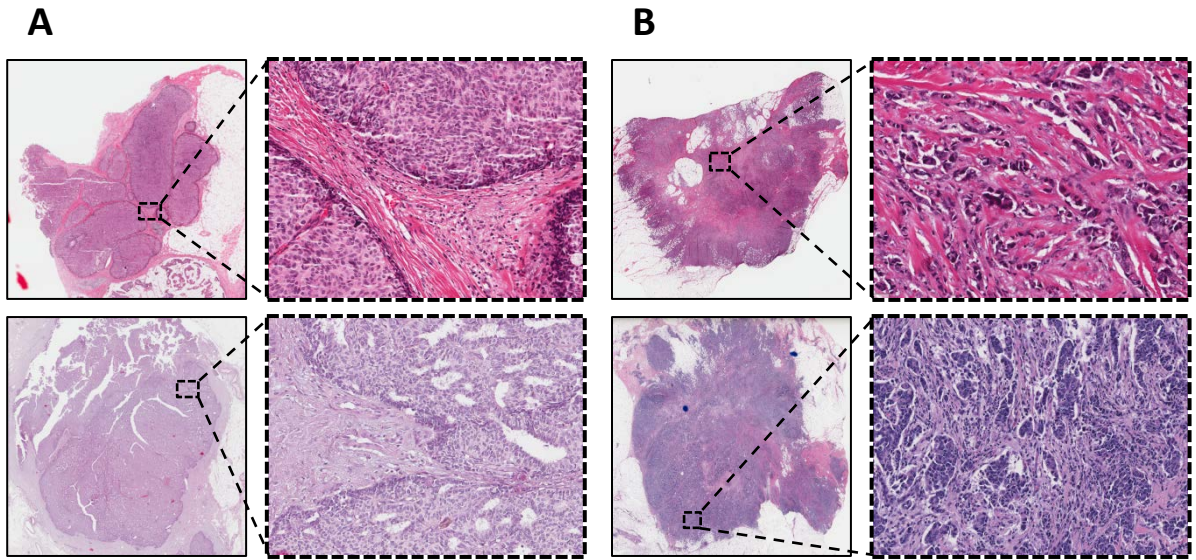

**Supplementary Figure 1. Histological analysis of TCGA breast tumors.** Tumors with distinct structure and compactly organized stroma surrounding a bulk tumorous structure were classified as tumors with "separated" stroma (A) whereas tumors with a more integrated pattern of stroma and cancer cells were classified as "mixed" (B).
