# Supplementary material for: The expression pattern of matrix-producing tumor stroma is of prognostic importance in breast cancer
Source: PubMed Central journal article supplement (PMC5095990; doi:10.1186/s12885-016-2864-2), 2016-11-04
Supplement: 12885_2016_2864_MOESM8_ESM.pdf [file 12885_2016_2864_MOESM8_ESM.pdf]

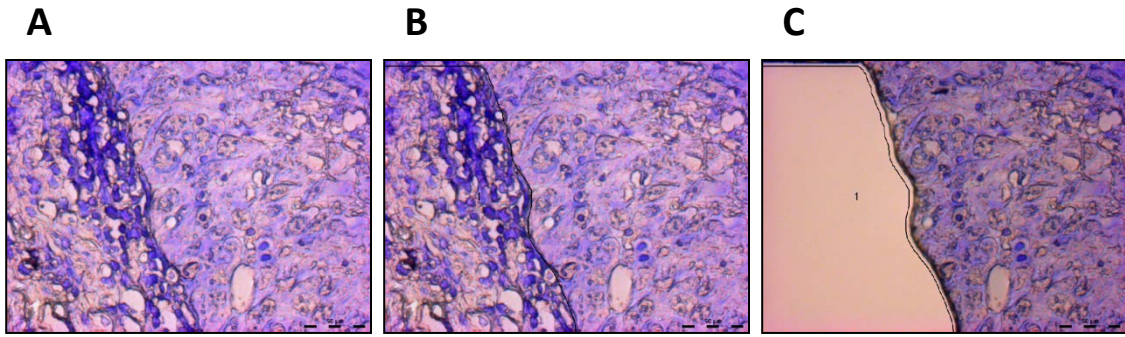

**Supplementary Figure 2. Laser Capture Microdissection.** Representative pictures of a cresyl violet stained triple-negative breast tumor (A), marked (B) and dissected (C) for inflammatory stromal compartment.
