# Supplementary material for: The expression pattern of matrix-producing tumor stroma is of prognostic importance in breast cancer
Source: PubMed Central journal article supplement (PMC5095990; doi:10.1186/s12885-016-2864-2), 2016-11-04
Supplement: 12885_2016_2864_MOESM9_ESM.pdf [file 12885_2016_2864_MOESM9_ESM.pdf]

**Table S4. IDs of TaqMan® gene expression assays**

| <b>Gene name</b> | <b>Assay ID</b> |
|------------------|-----------------|
| FAP              | Hs00990806_m1   |
| TCF4             | Hs00162613_m1   |
| P4HA2            | Hs00990001_m1   |
| P4HA3            | Hs00420085_m1   |
| ACTB             | Hs01060665_g1   |
| UBC              | Hs01871556_s1   |
