# Supplementary material for: The expression pattern of matrix-producing tumor stroma is of prognostic importance in breast cancer
Source: PubMed Central journal article supplement (PMC5095990; doi:10.1186/s12885-016-2864-2), 2016-11-04
Supplement: 12885_2016_2864_MOESM10_ESM.pdf [file 12885_2016_2864_MOESM10_ESM.pdf]

**Table S5. Expanded endothelial gene set used for identification of compact endothelial cluster**

|                 |               |               |
|-----------------|---------------|---------------|
| <i>ACVRL1</i>   | <i>ERG</i>    | <i>PREX2</i>  |
| <i>ADCY4</i>    | <i>ESAM</i>   | <i>PTPRB</i>  |
| <i>ARHGEF15</i> | <i>GJA4</i>   | <i>RHOJ</i>   |
| <i>BCL6B</i>    | <i>GNG11</i>  | <i>ROBO4</i>  |
| <i>CALCRL</i>   | <i>GPR116</i> | <i>S1PR1</i>  |
| <i>CD34</i>     | <i>GPR4</i>   | <i>SH2D3C</i> |
| <i>CD93</i>     | <i>LDB2</i>   | <i>SHE</i>    |
| <i>CDH5</i>     | <i>LHFP</i>   | <i>SOX17</i>  |
| <i>CLDN5</i>    | <i>LRRC70</i> | <i>TEK</i>    |
| <i>CLEC14A</i>  | <i>MMRN2</i>  | <i>THSD1</i>  |
| <i>CXorf36</i>  | <i>MYCT1</i>  | <i>TIE1</i>   |
| <i>DLL4</i>     | <i>NOTCH4</i> | <i>USHBP1</i> |
| <i>ECSCR</i>    | <i>PCDH12</i> | <i>VWF</i>    |
| <i>ELTD1</i>    | <i>PDE2A</i>  |               |
| <i>EMCN</i>     | <i>PLVAP</i>  |               |
