# Supplementary material for: The expression pattern of matrix-producing tumor stroma is of prognostic importance in breast cancer
Source: PubMed Central journal article supplement (PMC5095990; doi:10.1186/s12885-016-2864-2), 2016-11-04
Supplement: 12885_2016_2864_MOESM11_ESM.pdf [file 12885_2016_2864_MOESM11_ESM.pdf]

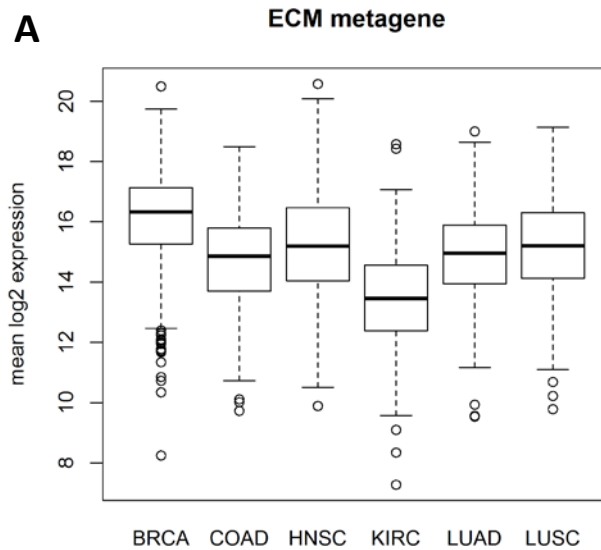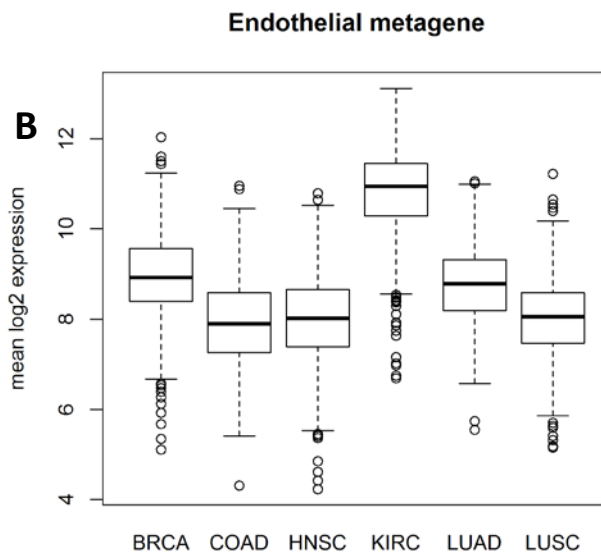

**Supplementary Figure 3. Levels of ECM and endothelial metagenes in different cancer types.** The expression levels of the ECM (A) and endothelial (B) metagenes were quantified in TCGA RNAseq cancer sets (BRCA – breast adenocarcinoma, COAD – colon adenocarcinoma, HNSC – head and neck squamous cell carcinoma, KIRC – kidney renal clear cell carcinoma, LUAD – lung adenocarcinoma, LUSC – lung squamous cell carcinoma)
